# Supplementary material for: Comparative Proteomic Analysis of Differential Responses of Pinus massoniana and Taxus wallichiana var. mairei to Simulated Acid Rain
Source: PubMed Central journal article supplement (PMC3975401; doi:10.3390/ijms15034333), 2014-03-12
Supplement: ijms-15-04333-s001.pdf [file ijms-15-04333-s001.pdf]

## Supplementary Information

**Table S1.** The details of identified proteins in *Pinus massoniana* under AR stress.

| Spot <sup>a</sup> | NCBI accession <sup>b</sup> | Protein identity <sup>c</sup>             | Peptide sequence                                                                                                                                                                                                                                       |
|-------------------|-----------------------------|-------------------------------------------|--------------------------------------------------------------------------------------------------------------------------------------------------------------------------------------------------------------------------------------------------------|
| Metabolism        |                             |                                           |                                                                                                                                                                                                                                                        |
| 4                 | gi 308807529                | aminoimidazole ribonucleotide carboxylase | R.MLGIAASPMGVRL + Oxidation (M)<br>R.MLGIAASPMGVRLK.A + 2 Oxidation (M)<br>K.RLAYDGR.G<br>R.LAYDGR.G<br>R.ARDGETR.A<br>R.AILGWPLGDTSLKVGGAVMK.N + Oxidation (M)<br>K.VGGAVMKNILGDAEGDEAMSR.A<br>R.AHRLMGAALEVPGASIHWYEKPDMA.A<br>K.MGHITVVGPSAAVATER.L |
| 12                | gi 90718161                 | granule bound starch synthase             | K.IYGPIAGEDYQDNQLR.F<br>R.FSLLCQAALAPR.I<br>R.FSLLCQAALAPRILNFTSSK.Y<br>K.YDASNVMSAKALLK.E<br>R.NIPVIGFIGRLEEK.G<br>K.GSDILIAAIPHFIKENVQIIVLGTGK.K<br>K.QLQQLEILYPGKAR.G                                                                               |

Table S1. Cont.

| Spot <sup>a</sup> | NCBI accession <sup>b</sup> | Protein identity <sup>c</sup>           | Peptide sequence                                                                                                                                                                                                                      |
|-------------------|-----------------------------|-----------------------------------------|---------------------------------------------------------------------------------------------------------------------------------------------------------------------------------------------------------------------------------------|
| 16                | gi 357122042                | UDP-arabinopyranose mutase 3-like       | K.YIYTIDDDCFVAK.D<br>K.NLLSPSTPFFFNTLYDPYR.D<br>R.GYPFSLR.E<br>K.GTLFPMCGMNLAFDRE.E<br>K.GTLFPMCGMNLAFDRE.E + Oxidation (M)<br>R.ELIGPAMYFGLMGDQPIGR.Y<br>R.ELIGPAMYFGLMGDQPIGR.Y + Oxidation (M)<br>K.TGLPYIWHSK.A<br>K.ASDPFVNLKK.E |
| 24                | gi 224122152                | mitochondrial phosphate carrier protein | K.YKSITSGFGVLLK.E<br>R.GFFRGWVPTLLGYSAQGACK.F<br>R.GWVPTLLGYSAQGACK.F<br>R.QIPYTMMK.F + Oxidation (M)<br>R.QIPYTMMKFASFETIVEQLYK.N<br>K.FASFETIVEQLYK.N<br>R.QLGLWGLFTR.G<br>K.VFVGLPTTGGAAPA.-                                       |

Table S1. Cont.

| Spot <sup>a</sup> | NCBI accession <sup>b</sup> | Protein identity <sup>c</sup>          | Peptide sequence                                                                                                                                                                                                                                                                                                                                                           |
|-------------------|-----------------------------|----------------------------------------|----------------------------------------------------------------------------------------------------------------------------------------------------------------------------------------------------------------------------------------------------------------------------------------------------------------------------------------------------------------------------|
| 27                | gi 435103                   | glyceraldehyde-phosphate dehydrogenase | R.CWHGR.K<br>K.DSPLDVVVINDTGGVK.Q<br>K.YDSILGTFDPDVQVAGNDGISVDGK.V<br>K.VVSDRNPVNLPWK.D<br>K.GTMTTTHSYTGDQR.L<br>R.VPTPNVSVVDL VVQVEK.K<br>R.VPTPNVSVVDL VVQVEKK.T<br>K.GILAVCDEPLVSIDFR.C<br>K.VVAWYDNEWGYSQR.V<br>R.VVDLADIVANNWK.S                                                                                                                                      |
| 28                | gi 396547                   | glutamate-ammonia ligase               | K.VIAEYIWIGGSGMDMR.S<br>K.VIAEYIWIGGSGMDMR.S<br>K.VIAEYIWIGGSGMDMR.S + Oxidation (M)<br>K.VIAEYIWIGGSGMDMR.S + Oxidation (M)<br>K.VIAEYIWIGGSGMDMR.S + 2 Oxidation (M)<br>K.VIAEYIWIGGSGMDMR.S + 2 Oxidation (M)<br>R.FIMER.I<br>R.FIMER.I<br>R.HKEHISAYGEGNER.R<br>R.HKEHISAYGEGNER.R<br>K.EHISAYGEGNER.R<br>K.EHISAYGEGNER.R<br>R.VGRDTEK.E<br>R.VGRDTEK.E<br>K.GYFEDR.R |

Table S1. Cont.

| Spot <sup>a</sup> | NCBI accession <sup>b</sup> | Protein identity <sup>c</sup> | Peptide sequence                                                                                                                                                                                                                 |
|-------------------|-----------------------------|-------------------------------|----------------------------------------------------------------------------------------------------------------------------------------------------------------------------------------------------------------------------------|
|                   |                             |                               | K.GYFEDR.R<br>R.RPASNMDPYIVTSMIAETTILWKP.- + Oxidation (M)<br>R.RPASNMDPYIVTSMIAETTILWKP.- + Oxidation (M)                                                                                                                       |
| 29                | gi 308806413                | putative D-protein            | R.ASSGASVTPNVTSQVRDR.F<br>R.MYLADVWELDLR.R<br>R.MYLADVWELDLRR.V<br>R.RMVWTMLHDGVSPGMVPSGR.S + 2 Oxidation (M)<br>R.MVWTMLHDGVSPGMVPSGR.S<br>R.WTMIKENTASSMSGVGSAR.M + Oxidation (M)<br>R.WTMIKENTASSMSGVGSAR.M + 2 Oxidation (M) |
| 34                | gi 357448955                | nicotianamine synthase        | K.LITLCGK.A<br>K.NYLKLTHLEFTMFTK.H + Oxidation (M)<br>R.MLFHTSDIVDVKNELK.E + Oxidation (M)<br>K.EFNVVFLAALVGMDKK.E + Oxidation (M)<br>K.VINHLAKYMAPGAILVLR.S + Oxidation (M)<br>K.YMAPGAILVLR.S + Oxidation (M)                  |
| 39                | gi 303281782                | ABC transporter               | K.TWQAKCGALTVCGDLASR.V<br>K.CGALTVCGDLASRVPA YFMR.N<br>R.VLLQRTNFSLER.G<br>K.EVGFDDAKMAATIQLSLSGGWR.M<br>K.MAATIQLSLSGGWR.M<br>K.NLTYYPMGFR.D + Oxidation (M)<br>K.VIMYMKNVSFTYPGTTK.Q<br>R.AALVGLNGAGKTTLMK.L                   |

Table S1. Cont.

| Spot <sup>a</sup> | NCBI accession <sup>b</sup> | Protein identity <sup>c</sup> | Peptide sequence                                                                                                                                                                                                       |
|-------------------|-----------------------------|-------------------------------|------------------------------------------------------------------------------------------------------------------------------------------------------------------------------------------------------------------------|
| 41                | gi 13873338                 | lipoic acid synthase          | K.LLIGELSPDEGVGEVWQHHLNR.L<br>-.MQSRVPSLLAR.T<br>R.LADESPSLGDFMNLQSGYSVEVGNK.K<br>K.QSLEVLMAAR.E<br>K.QSLEVLMAAREFSPPGTLTK.T<br>R.EFSPPGTLTKTSIMLGGETPDQVVK.S + Oxidation (M)<br>R.AAGVDVITFGQYMRPSK.R + Oxidation (M) |
| 48                | gi 190899164                | 2Fe-2S ferredoxin             | K.CGPMVLDALIK.I + Oxidation (M)<br>R.EGICGSCAMNMDGCNGLACLTKIDK.S + 2 Oxidation<br>K.IDKSGPPSMINPLPHMFVIK.D<br>K.SIEPWLKR.K                                                                                             |
| 54                | gi 15240625                 | transaldolase                 | R.SFVNFRALNAK.L<br>R.CSVSGGNGTAGK.R<br>R.CSVSGGNGTAGKR.T<br>K.RTTLHDLYEK.E<br>K.VGEQLEDEGVDSFKK.S<br>K.KSFESLLGTLQDK.A                                                                                                 |
| 57                | gi 126583387                | ferritin                      | -.MWPRVAPSPATAAAAAAVGQLSGAGLAAGSVR.L + Oxidation (M)<br>R.LPGPLPSAAGSAVCCR.A<br>K.FFKESSDEER.G<br>K.ESSDEERGHADK.L                                                                                                     |

Table S1. Cont.

| Spot <sup>a</sup>                  | NCBI accession <sup>b</sup> | Protein identity <sup>c</sup>      | Peptide sequence                                                                                                                                                              |
|------------------------------------|-----------------------------|------------------------------------|-------------------------------------------------------------------------------------------------------------------------------------------------------------------------------|
| Cell structure                     |                             |                                    |                                                                                                                                                                               |
| 62                                 | gi 29028306                 | UDP-glucose dehydrogenase          | -.MVKICCIGAGYVGGPTMAVIALK.C<br>K.ILMHNSK.G<br>R.IITTNLWSAELSK.L<br>R.VVSSMFNTVSGKK.I<br>R.DLAMNKFDWDHPIHLQPMSPYAVK.Q + Oxidation (M)<br>R.VTWDAYEATK.G<br>K.GAHGVCILTEWDEFK.T |
| Protein synthesis and modification |                             |                                    |                                                                                                                                                                               |
| 6                                  | gi 357111489                | oxygen-evolving enhancer protein 1 | K.AGKYEMK.K<br>K.FEEKDGIDYAAVTVQLPGGER.V<br>K.DGIDYAAVTVQLPGGER.V<br>R.VPFLFTVK.Q<br>R.GGSTGYDNAVALPAGGR.G<br>R.GGSTGYDNAVALPAGGRGDEEELAK.E                                   |
| 11                                 | gi 46811008                 | small ribosomal protein 4          | R.SGRTDQLIPNK.K<br>K.AKGSTGQVLLQLLEMRL.L<br>R.LGMASTIPEAR.Q<br>R.LGMASTIPEARQLVNHR.H + Oxidation (M)<br>R.LGMAKGMDSIQSK.K + 2 Oxidation (M)<br>K.GVGLVNQIIDREWISLK.I          |
| 20                                 | gi 308801835                | Ulp1 protease family protein       | R.HIALATRMVLSHR.S<br>R.ASGTLGAAPER.E<br>R.DEIDHLTPVLAPGGALDR.G                                                                                                                |

Table S1. Cont.

| Spot <sup>a</sup> | NCBI accession <sup>b</sup> | Protein identity <sup>c</sup>                  | Peptide sequence                                                                                                                                                                                                                                                                                      |
|-------------------|-----------------------------|------------------------------------------------|-------------------------------------------------------------------------------------------------------------------------------------------------------------------------------------------------------------------------------------------------------------------------------------------------------|
|                   |                             |                                                | K.TITDDGREAR.R<br>R.ESAWRR.A<br>K.RFGAVNIFGHALK.K<br>K.SMISSFENGTMVGR.A + 2 Oxidation (M)<br>R.QVLSSSTASALDEQLER.L<br>R.VMESRSEGETQPR.A + Oxidation (M)<br>R.SEGETQPRAHFFSTFFINK.L<br>K.NGCDCGVFMIK.Y<br>K.NGCDCGVFMIK.Y + Oxidation (M)                                                              |
| 21                | gi 297830742                | kinase family protein                          | K.DCIDAKNNITTFDNISFK.T<br>K.NNITTFDNISFKTDSSR.R<br>R.VYKGHIETPEQVAVK.Q<br>R.ILVYEYMQNGSLEDHLELAR.N + Oxidation (M)<br>K.SDVYSFGVVFLEMITGR.R<br>R.VIDTTKPTQEQLVTWASPLFKDR.R<br>K.TEEDGQTVEEEEEDERSK.L                                                                                                  |
| 31                | gi 6525065                  | chloroplast translational elongation factor Tu | K.YDEIDAAPEER.A<br>K.NMITGAAQMDGAILVVSADGMPQTK.E + 2 Oxidation (M)<br>K.TMDDAMAGDNVGLLLR.G + Oxidation (M)<br>K.DDIERGMVLAKPASITPHTK.F<br>R.HSPFFPGYRPQFYMR.T<br>R.VKMVVELIQPVACEQGMR.F + Oxidation (M)<br>R.VKMVVELIQPVACEQGMR.F + 2 Oxidation (M)<br>K.MVVELIQPVACEQGMRFAIPEGGK.T + 2 Oxidation (M) |

Table S1. Cont.

| Spot <sup>a</sup> | NCBI accession <sup>b</sup> | Protein identity <sup>c</sup>    | Peptide sequence                                                                                                                                                                                                                                                                                                                                                                   |
|-------------------|-----------------------------|----------------------------------|------------------------------------------------------------------------------------------------------------------------------------------------------------------------------------------------------------------------------------------------------------------------------------------------------------------------------------------------------------------------------------|
| 37                | gi 159477317                | T-complex protein 1 beta subunit | K.VHPMTIIAGYR.E<br>K.VHPMTIIAGYR.E + Oxidation (M)<br>K.ILTVDKHEHFANLAVDAIMR.L<br>R.IENARILVANTPMDTDK.I + Oxidation (M)<br>R.VDSMAKVAEIEAAEK.D<br>K.VRSIIDHGINCFVNR.Q<br>R.SIIDHGINCFVNR.Q<br>R.LALVLGGEIVSTFDNPSEVK.L<br>R.SLHDALCVLK.E<br>R.VVYGGGWPEIR.M<br>R.VVYGGGWPEIRMAK.A<br>K.AVEELASR.T<br>K.AAHGADSSSRMGVDVVR.G + Oxidation (M)<br>R.GEAGDMKELGIYESFR.V + Oxidation (M) |
| 45                | gi 233142272                | glycogen synthase kinase         | R.EASGHGAAGVDRLPEEMNDMK.I + Oxidation (M)<br>R.EMEATVVDGNGTETGHIIVTTIGGR.N<br>K.QTISYMAER.V<br>K.NRELQTMRL<br>R.MPLIYVKLYTYQIFR.A<br>K.CMNPNYTEFK.F<br>K.CMNPNYTEFKFPQIK.A + Oxidation (M)<br>K.AHPWHKIFHK.R                                                                                                                                                                       |
| 49                | gi 255560267                | chaperonin-60kD                  | K.CELEDPLILIEKK.I<br>K.VCAIKAPGFGENR.K                                                                                                                                                                                                                                                                                                                                             |



Table S1. Cont.

| Spot <sup>a</sup>                    | NCBI accession <sup>b</sup> | Protein identity <sup>c</sup> | Peptide sequence                                                                                                                                                                                                                                                                                                                                                                                                                                                          |
|--------------------------------------|-----------------------------|-------------------------------|---------------------------------------------------------------------------------------------------------------------------------------------------------------------------------------------------------------------------------------------------------------------------------------------------------------------------------------------------------------------------------------------------------------------------------------------------------------------------|
|                                      |                             |                               | R.KASMQDLAVLTGGQVITEELGMNLEK.V + 2 Oxidation (M)<br>K.VGAEAFGSCKK.V<br>K.SGIIDPLK.V<br>K.EPTAMAGGGGGMGY.- + 2 Oxidation (M)                                                                                                                                                                                                                                                                                                                                               |
| Photosynthesis and energy production |                             |                               |                                                                                                                                                                                                                                                                                                                                                                                                                                                                           |
| 3                                    | gi 228016009                | ATP synthase CF1 beta subunit | K.GQGTAGQEIQVTCEVQQLLGNHK.V<br>R.AVAMSATDGLTR.G<br>R.VIDTGAPLSVPVGGATLGR.I<br>R.IFNVLGEPVDNLGPVDAR.I<br>R.ITSPIHRPAPAFTELDTK.L<br>K.LSIFETGIK.V<br>K.VVDLLAPYR.R<br>K.VVDLLAPYRR.G<br>K.IGLFGGAGVGK.T<br>K.AHGGVSVFGGVGER.T<br>K.VALVYQMNEPPGAR.M<br>K.VALVYQMNEPPGAR.M + Oxidation (M)<br>R.VGLTALTMAEYFR.D<br>R.VGLTALTMAEYFR.D + Oxidation (M)<br>R.DVNEQDVLLFIDNIFR.F<br>R.FVQAGSEVSALLGR.M<br>R.MPSAVGYQPTLSTEMGSLQER.I<br>R.MPSAVGYQPTLSTEMGSLQER.I + Oxidation (M) |

Table S1. Cont.

| Spot <sup>a</sup> | NCBI accession <sup>b</sup> | Protein identity <sup>c</sup>      | Peptide sequence                                                                                                                                                                                                                                                                                                                                            |
|-------------------|-----------------------------|------------------------------------|-------------------------------------------------------------------------------------------------------------------------------------------------------------------------------------------------------------------------------------------------------------------------------------------------------------------------------------------------------------|
| 9                 | gi 357481701                | Ycf2                               | M.TSYFDLSTERSMNK.D<br>R.NPLKPFHRSSLISSFLK.A<br>K.LKSQMMYLFYNR.Y + Oxidation (M)<br>R.GSPKFQQFVSIFHDIR.D<br>R.HLSHTSIYGSSLYTLIR.K<br>K.IESWILNSDFIADK.E<br>K.YLATNSYVPFITVSLNK.F<br>K.KIFDTNGCGSITLGSNVR.D                                                                                                                                                   |
| 17                | gi 56784992                 | putative ATP synthase beta subunit | -MDGTEGLVRGQR.V + Oxidation (M)<br>K.GDITTNHFLPIHR.E<br>K.VVDLLAPYQR.G<br>K.TVLIMELINNVAK.A<br>K.AHGGFSVFAGVGER.T<br>R.EGNDLYREMIESGVIK.L + Oxidation (M)<br>K.CALVYGQMNEPPGAR.A<br>R.VGLTGLTVAEHFR.D<br>R.DAEGQDVLLFIDNIFR.F<br>R.FTQANSEVSALLGR.I<br>R.IPSAVGYQPTLATDLGGLQER.I<br>R.QISELGIYPAVDPLDSTSR.M<br>K.NLQDIIAILGMDELSEDDKLTVAR.A + Oxidation (M) |
| 18                | gi 220938463                | phosphoenolpyruvate carboxykinase  | K.GSFVTSTGALATLSGAK.T<br>K.GSFVTSTGALATLSGAKTGR.S<br>K.KGLFGLMHYLMPK.R + Oxidation (M)                                                                                                                                                                                                                                                                      |

Table S1. Cont.

| Spot <sup>a</sup> | NCBI accession <sup>b</sup> | Protein identity <sup>c</sup>                                    | Peptide sequence                                                                                                                                                                                         |
|-------------------|-----------------------------|------------------------------------------------------------------|----------------------------------------------------------------------------------------------------------------------------------------------------------------------------------------------------------|
|                   |                             |                                                                  | K.NVILLACDAFGVLPPVSK.L<br>K.EPQATFSACFGAAFIMLHPTK.Y + Oxidation (M)<br>K.TEVFGLEIPTEIK.G<br>K.ETLLTLAGLFKK.N                                                                                             |
| 35                | gi 18073888                 | phosphoenolpyruvate carboxylase                                  | R.GGGPHTLAAILSQPPDTIHGSLR.V<br>R.ALLDEMAVVATEEYRSIVFQEPF.F<br>K.DIKNLHMLQEMYNAWPFFR.V + Oxidation (M)<br>K.NLHMLQEMYNAWPFFR.V + 2 Oxidation (M)<br>R.DLLEGDPYLKQR.L<br>K.EIMDSNKTAELVK.L + Oxidation (M) |
| 44                | gi 31281466                 | ribulose-1,5-bisphosphate carboxylase/oxygenase<br>large subunit | R.NHGMHFR.V<br>R.MSGGDHIHAGTVVGKLEGER.D<br>R.DVTLGFVDLLR.D<br>R.DVTLGFVDLLRDDFIEK.D<br>R.VALEACVQAR.N<br>K.WSPELAAACEIWK.E<br>K.EIKFEFDVIDR.L<br>K.FEFDVIDRL.-                                           |
| 50                | gi 166714465                | ribulose-1,5-bisphosphate carboxylase/oxygenase<br>large subunit | R.LTYYTPEYQTK.D<br>K.DTDILAAFR.V<br>K.TFQGPPHGIQVER.D<br>K.YGRPLLGCTIKPK.L                                                                                                                               |

Table S1. Cont.

| Spot <sup>a</sup> | NCBI accession <sup>b</sup> | Protein identity <sup>c</sup> | Peptide sequence                            |
|-------------------|-----------------------------|-------------------------------|---------------------------------------------|
|                   |                             |                               | R.AVYECLR.G                                 |
|                   |                             |                               | R.GGLDFTKDDENVNSQPFMR.W                     |
|                   |                             |                               | R.GGLDFTKDDENVNSQPFMR.W + Oxidation (M)     |
|                   |                             |                               | K.DDENVNSQPFMR.W                            |
|                   |                             |                               | K.DDENVNSQPFMR.W + Oxidation (M)            |
|                   |                             |                               | R.ELGVPIVMHDYLTGGFTANTSLAHYCR.D             |
|                   |                             |                               | R.ELGVPIVMHDYLTGGFTANTSLAHYCR.D + Oxidation |
|                   |                             |                               | R.DNGLLLHIHR.A                              |
|                   |                             |                               | R.QRNHGMHFR.V + Oxidation (M)               |
|                   |                             |                               | R.NHGMHFR.V                                 |
|                   |                             |                               | R.DVTLGFVDLLR.D                             |
|                   |                             |                               | R.DVTLGFVDLLRDDFIEK.D                       |
|                   |                             |                               | R.VALEACVQAR.N                              |
|                   |                             |                               | K.WSPELAAACEIWK.E                           |
|                   |                             |                               | K.EIKFEFDVIDR.L                             |
|                   |                             |                               | K.FEFDVIDR.L                                |
|                   |                             |                               | K.FEFDVIDRL.-                               |
| 53                | gi 332591479                | phosphoglycerate kinase 1     | R.ADLNVPLDENQNITDDTR.I                      |
|                   |                             |                               | K.YSLKPLVPR.L                               |
|                   |                             |                               | R.LTELLGVNVVK.A                             |
|                   |                             |                               | K.AVASLPNGGVLLLENVR.F                       |
|                   |                             |                               | K.KLASIADLYVNDAFGTAHR.A                     |
|                   |                             |                               | K.LASIADLYVNDAFGTAHR.A                      |
|                   |                             |                               | K.YLKPAVAGFLLQK.E                           |

Table S1. Cont.

| Spot <sup>a</sup> | NCBI accession <sup>b</sup> | Protein identity <sup>c</sup>                                    | Peptide sequence                                                                                                                                                                                                                   |
|-------------------|-----------------------------|------------------------------------------------------------------|------------------------------------------------------------------------------------------------------------------------------------------------------------------------------------------------------------------------------------|
|                   |                             |                                                                  | K.IELAKTLMQK.A<br>K.GVSLLLPTDVVIADK.F<br>K.VVPASDIPDGWMGLDIGADSIK.T<br>K.VVPASDIPDGWMGLDIGADSIK.T + Oxidation (M)<br>K.TVIWNGPMGVFEFDK.F<br>K.TVIWNGPMGVFEFDK.F + Oxidation (M)<br>K.GVITHGGGDSVAAVEK.V<br>K.MSHISTGGGASLELLEGGK.T |
| 55                | gi 34733684                 | ribulose-1,5-bisphosphate carboxylase/oxygenase<br>large subunit | R.LTYYTPEYQTK.D<br>K.DTDILAAFR.V<br>K.TFQGPPHGIQVER.D<br>K.YGRPLLGCTIK.H<br>K.NHGMHFR.V + Oxidation (M)<br>R.EITLGFVDLLR.D                                                                                                         |
| 60                | gi 264160443                | ribulose 1,5-bisphosphate carboxylase                            | -.EYETKDTDILAAFR.V<br>K.DTDILAAFR.V<br>R.DNGLLLHIHR.A<br>R.QKNHGMHFR.V + Oxidation (M)<br>K.NHGMHFR.V<br>K.NHGMHFR.V + Oxidation (M)<br>R.MSGGDHIHAGTVVGK.L<br>R.EITLGFVDLLR.D                                                     |

Table S1. Cont.

| Spot <sup>a</sup>  | NCBI accession <sup>b</sup> | Protein identity <sup>c</sup>                                | Peptide sequence                                                                                                                                                                             |
|--------------------|-----------------------------|--------------------------------------------------------------|----------------------------------------------------------------------------------------------------------------------------------------------------------------------------------------------|
| 65                 | gi 357111628                | succinate dehydrogenase [ubiquinone]<br>flavoprotein subunit | R.AAIGLSEHGFNTACITK.L<br><br>R.WHMYDTVK.G<br>K.GSDWLGDQDSIQYMCR.E + Oxidation (M)<br>K.AVIELENYGLPFSR.T<br>R.LGANSLLDIVVFGR.A<br>R.TQETLEEGCQLISK.A<br>K.AWESFHDVK.I                         |
| Stress and defense |                             |                                                              |                                                                                                                                                                                              |
| 5                  | gi 255575353                | peroxiredoxin                                                | K.LSFSPLSLKLQSK.A<br>K.HLPGFVEK.S<br>K.GIDVIACVSVNDAFVMK.A + Oxidation (M)<br>R.RYAILAEDGVVK.V<br>R.YAILAEDGVVK.V                                                                            |
| 10                 | gi 192912966                | cytosolic ascorbate peroxidase                               | R.IAWHSAGTYDVK.T<br>K.GSDHLR.D<br>R.DVFGHMGLSDQDIVALSGGHTLGR.C<br>R.DVFGHMGLSDQDIVALSGGHTLGR.C + Oxidation (M)<br>R.SGFEGAWTSNPLIFDNSYFK.E<br>K.ELLSGEKEGLLQLPSDK.A<br>K.YAADEDAFFADYAEHLK.L |
| 13                 | gi 289187423                | tau class glutathione S-transferase                          | K.VLNLWASPFGLR.V<br>K.GVKYEQEENLASK.S                                                                                                                                                        |

Table S1. Cont.

| Spot <sup>a</sup> | NCBI accession <sup>b</sup> | Protein identity <sup>c</sup>       | Peptide sequence                                                                                                                                                                                                                           |
|-------------------|-----------------------------|-------------------------------------|--------------------------------------------------------------------------------------------------------------------------------------------------------------------------------------------------------------------------------------------|
|                   |                             |                                     | R.FWADFVDKK.I<br>K.KIYDNGGALIMK.C<br>K.IPLETQFPR.L<br>R.LHEWVNACMER.E<br>R.LHEWVNACMER.E + Oxidation (M)<br>K.VLPHPEKVAEFAMQMR.Q<br>K.VAEFAMQMR.Q<br>K.VAEFAMQMR.Q + Oxidation (M)<br>K.VAEFAMQMRQR.F + Oxidation (M)                      |
| 14                | gi 289187423                | tau class glutathione S-transferase | K.VLNLWASPFGLR.V<br>K.GVKYEQEENLASK.S<br>R.FWADFVDKK.I<br>K.IYDNGGALIMK.C + Oxidation (M)<br>K.IPLETQFPR.L<br>R.LHEWVNACMER.E<br>K.VLPHPEKVAEFAMQMR.Q<br>K.VAEFAMQMR.Q<br>K.VAEFAMQMR.Q + Oxidation (M)<br>K.VAEFAMQMR.Q + 2 Oxidation (M) |
| 30                | gi 66841104                 | manganese superoxide dismutase      | K.AIDTQFGSLNAVIEK.M<br>K.GLLPLLGDVWEHAYYLQYK.N<br>K.NVRPDYLK.N<br>K.YAEEIFEK.E<br>K.YAEEIFEKEINP.-                                                                                                                                         |

Table S1. Cont.

| Spot <sup>a</sup> | NCBI accession <sup>b</sup> | Protein identity <sup>c</sup>              | Peptide sequence                                                                                                                                                                                                                                                                                                                 |
|-------------------|-----------------------------|--------------------------------------------|----------------------------------------------------------------------------------------------------------------------------------------------------------------------------------------------------------------------------------------------------------------------------------------------------------------------------------|
| 33                | gi 154101561                | phenylalanine ammonia-lyase                | -.DWVMESMNK.G + Oxidation (M)<br>-.DWVMESMNKGTDSYGVTTGFGATSHR.R + 2 Oxidation (M)<br>K.GTDSYGVTTGFGATSHRR.T<br>R.AAMLVRINTLLQGYSGIR.F<br>K.HHPGQIEAAAIMEHILDG.-                                                                                                                                                                  |
| 36                | gi 380863088                | stromal ascorbate peroxidase               | K.CAASDPVQLKSAR.E<br>K.TKFCHPILVR.L<br>K.FCHPILVR.L<br>R.LGWHDAGTYNKNIEEWPQR.G                                                                                                                                                                                                                                                   |
| 43                | gi 357513733                | Tir-nbs-lrr resistance protein             | K.AIDDSHMSLVVFSK.D + Oxidation (M)<br>K.AIDDSHMSLVVFSKDYATSK.W + Oxidation (M)<br>K.DYATSK.W<br>K.LNGHVVIPVFYNIDPSHVRHQK.E<br>K.SHVDKVSEWK.A<br>K.LALMYPNELKDIVK.V<br>K.DIVKVDENSEHIELLLK.T<br>K.VDEIYEVKTWK.L<br>K.QEFWESELNLYENK.G<br>K.DLELELYQEIQFER.S<br>K.ENLDDDDDDNSKQMVK.S + Oxidation (M)<br>K.SKILYENCTMSGREETETSSHK.Q |
| 51                | gi 195620494                | membrane-associated salt-inducible protein | -.MAAAVRHIVR.R + Oxidation (M)<br>R.SFYSVFDEMCKK.G<br>K.KGLKPNSITFTTALAGFYK.E                                                                                                                                                                                                                                                    |



Table S1. Cont.

| Spot <sup>a</sup> | NCBI accession <sup>b</sup> | Protein identity <sup>c</sup>                  | Peptide sequence                                                                                                                                                                                                                                                                                       |
|-------------------|-----------------------------|------------------------------------------------|--------------------------------------------------------------------------------------------------------------------------------------------------------------------------------------------------------------------------------------------------------------------------------------------------------|
|                   |                             |                                                | K.GLKPNSITFTTALAGFYKEEK.F<br>R.SGEARALVDEMMK.K + Oxidation (M)<br>K.GTKPNWVTYNHLYGFCK.E<br>K.GTKPNWVTYNHLYGFCKEGDLEEAK.R                                                                                                                                                                               |
| 59                | gi 308804281                | cytochrome b5                                  | M.DDPSRPR.S<br>M.DDPSRPRSAPASAGTHAKPSTTSQSVGK.I<br>K.ITLRPGYSQMDWLR.R + Oxidation (M)<br>R.SFGTDATALFDKYHK.W<br>K.YHKWVNGEYIMR.A                                                                                                                                                                       |
| 64                | gi 56481813                 | thiazole biosynthetic enzyme                   | K.YDLQSFK.F<br>R.VSGVVTNWALVSMNHDTQSCMDPNVMESK.V + 2 Oxidation (M)<br>R.VSGVVTNWALVSMNHDTQSCMDPNVMESK.V + 3 Oxidation (M)<br>K.VVVSSCGHDGPFATGVK.R<br>K.SVGMIDKVPGMK.A + Oxidation (M)<br>R.EIVPGMIVTGMEVAEIDGSPR.M<br>R.EIVPGMIVTGMEVAEIDGSPR.M + Oxidation (M)<br>R.MGPTFGAMMVSGQK.A + Oxidation (M) |
| Hormone response  |                             |                                                |                                                                                                                                                                                                                                                                                                        |
| 7                 | gi 212725010                | abscisic acid and water-stress induced protein | K.ERFGELGTVAAGGYALYER.N<br>R.FGELGTVAAGGYALYER.N<br>R.HKTEEEVAAAGAVGTGGYAFHER.H<br>K.TEEEVAAAGAVGTGGYAFHER.H                                                                                                                                                                                           |

Table S1. Cont.

| Spot <sup>a</sup>   | NCBI accession <sup>b</sup> | Protein identity <sup>c</sup>        | Peptide sequence                                                                                                                                                                                                                                    |
|---------------------|-----------------------------|--------------------------------------|-----------------------------------------------------------------------------------------------------------------------------------------------------------------------------------------------------------------------------------------------------|
| 40                  | gi 224108798                | gibberellin 2-oxidase                | K.MENESFNFFAK.T<br>K.QKAGLDNSFGYGCK.N<br>R.ELACELLDLMAEGLWVPDR.S<br>R.LNHYPAMPILCK.D + Oxidation (M)<br>K.SRMSMAYFAAPPLNAR.I<br>K.SRMSMAYFAAPPLNAR.I + Oxidation (M)<br>R.LGDSRLGLFMLEVDDQVA.- + Oxidation (M)<br>R.LGLFMLEVDDQVA.- + Oxidation (M) |
| 47                  | gi 357485291                | auxin-responsive protein             | K.NVVSNGKR.G<br>K.NSMATASK.N<br>K.NSMATASK.N + Oxidation (M)<br>K.NSMATASKNNNDEVDGKPGPAALFVK.V + Oxidation (M)<br>K.EMMSESK.L<br>K.DGDWMLVGDVPWEMFIDTCR.R                                                                                           |
| Signal transduction |                             |                                      |                                                                                                                                                                                                                                                     |
| 8                   | gi 145336050                | calciosin-related protein            | -.MSHQTVALASKAK.S + Oxidation (M)<br>K.MTALEKHVSFFDR.N<br>K.DGTVYPWETYQGFR.A<br>R.LLAAFVAIFINMGLSK.K + Oxidation (M)<br>K.DALTAEEIQMLK.T<br>K.SVRAIYDGSFLFHQLEK.K                                                                                   |
| 25                  | gi 22128710                 | putative signal transduction protein | R.FPISSDRAHVHSLAFTWHDAFK.T<br>R.AHVHSLAFTWHDAFKTK.K                                                                                                                                                                                                 |

Table S1. Cont.

| Spot <sup>a</sup> | NCBI accession <sup>b</sup> | Protein identity <sup>c</sup>                            | Peptide sequence                                                                                                                                                                                       |
|-------------------|-----------------------------|----------------------------------------------------------|--------------------------------------------------------------------------------------------------------------------------------------------------------------------------------------------------------|
|                   |                             |                                                          | R.GVAAPLLDSV NKLESNMK.T<br>K.LESNMKTNLER.A<br>R.VPDASSLGALPAASLVKPTSLAEVLDASK.E<br>K.ERLFSSLVPDGSMK.A + Oxidation (M)<br>R.LFSSLVPDGSMKALSK.Y<br>K.QQCSD FIMTRNIQCR.E<br>R.EMIEDVQKK.L + Oxidation (M) |
| 42                | gi 226494574                | T-cell activation protein phosphatase<br>2C-like protein | R.FVASVLGDWMETEYATSER.K + Oxidation (M)<br>K.VGSMPAAR.D + Oxidation (M)<br>R.MGTNLGFSPKNMADIAGIAYGISK.D<br>K.WACTPFGMGYMKVHGLAR.R<br>K.VHGLARR.G                                                       |
| 52                | gi 225425656                | probable calcium-binding protein CML30                   | K.SPDPDPVLGPQHDTGHNK.K<br>K.SPDPDPVLGPQHDTGHNK.L<br>K.GGELKMVMDR.L + Oxidation (M)<br>R.VLCSLGLKEGSQVEDCR.R<br>K.EFVKFLDK.S                                                                            |
| 63                | gi 357440111                | calcium-dependent protein kinase                         | K.VASMTETILNAK.Q<br>R.TTGEVLACKSIK.D<br>R.WFLYCHENGIVHR.D<br>R.FPSEPWDRISK.S<br>K.IESSGEWHVGGGSFMSR.N<br>K.IESSGEWHVGGGSFMSR.N + Oxidation (M)                                                         |

Table S1. Cont.

| Spot <sup>a</sup> | NCBI accession <sup>b</sup> | Protein identity <sup>c</sup> | Peptide sequence                                                                                                                                                                                                                           |
|-------------------|-----------------------------|-------------------------------|--------------------------------------------------------------------------------------------------------------------------------------------------------------------------------------------------------------------------------------------|
|                   |                             |                               | R.WLSCTQLPTSPKSSLVC.-                                                                                                                                                                                                                      |
|                   |                             | Transcription                 |                                                                                                                                                                                                                                            |
| 15                | gi 384584973                | maturase K                    | -.PSLHLLRFFLNYYSNWNSLITSMK.S + Oxidation (M)<br>R.FFLNYYSNWNSLITSMK.S + Oxidation (M)<br>R.LSRFLYNSYVSEYEFFLLFLR.K<br>R.IRLNQLTNSCFDFLGYR.S<br>K.KFDTTAPGTPLIGSLAK.A<br>K.FDTTAPGTPLIGSLAK.A                                               |
| 22                | gi 313199657                | RNA polymerase beta subunit   | K.AKHQSR.E<br>R.EYAISELYKLLYGTDEYLK.F<br>R.MNRATQHK.R<br>K.CIVGTGLEGQVAPDSGTVVVAAR.G<br>R.MNVGQIFECVLGIAGDFLR.R<br>R.MNVGQIFECVLGIAGDFLR.R + Oxidation (M)<br>R.MNVGQIFECVLGIAGDFLR.H<br>R.QKVSTIVAGEPIYEPEVITPESFR.L                      |
| 23                | gi 372482380                | RNA polymerase beta subunit   | K.VDRFFFIPEEVHILPGSSSIMVR.N + Oxidation (M)<br>K.NGSMEEVHASFVEVR.A + Oxidation (M)<br>K.NGSMEEVHASFVEVRANDLIR.D + Oxidation (M)<br>K.IPLVTQHQTIGTLLNRNK.E<br>K.YNNVVKESNPITPIR.G<br>K.QTFQVLQVLKYCLIDENK.R<br>K.YCLIDENKR.I<br>K.YGPHIKK.S |

Table S1. Cont.

| Spot <sup>a</sup>                          | NCBI accession <sup>b</sup> | Protein identity <sup>c</sup> | Peptide sequence                                                                                                                                                                       |
|--------------------------------------------|-----------------------------|-------------------------------|----------------------------------------------------------------------------------------------------------------------------------------------------------------------------------------|
|                                            |                             |                               | R.RVEGWNER.I<br>R.HIEIIVWQVTSK.V<br>R.AIFLGITR.A<br>R.GRIDWLK.G<br>K.ENVVVLGGIIPVGTGFKK.L<br>R.QDKNIHLEIK.K                                                                            |
| 26                                         | gi 18419497                 | transposase                   | K.SEKYYLLTEEDDPHR.T<br>K.YYLLTEEDDPHRTFK.N<br>R.FMFLCVCARPRFR.D + Oxidation (M)<br>R.GDLVMKPITSITR.D<br>R.EDVGKPIFIQQDNA.-                                                             |
| 56                                         | gi 108862655                | retrotransposon protein       | R.GAWEYTGYNPDMRTHVGER.W<br>R.THVGER.W<br>R.DGQELADPGLR.S<br>R.SLHTPQRGPR.A<br>R.QIPTFPESPQLQEK.T<br>K.QPFEHVDPV.-                                                                      |
| Function unknown and hypothetical proteins |                             |                               |                                                                                                                                                                                        |
| 1                                          | gi 326501884                | predicted protein             | K.FLSKLLALSPGSMGK.F<br>K.LLALSPGSMGK.F<br>K.TVASMETETVVRK.S + Oxidation (M)<br>R.VYSLTLPDPPIGDR.Y<br>R.YLIGSSHGWLITADDK.S<br>R.YNPDLNPQMVGPK.I + Oxidation (M)<br>K.TNPRDIGVLNLEDDSR.E |

Table S1. Cont.

| Spot <sup>a</sup> | NCBI accession <sup>b</sup> | Protein identity <sup>c</sup> | Peptide sequence                                                                                                                                                                                                                                                                                                                                                      |
|-------------------|-----------------------------|-------------------------------|-----------------------------------------------------------------------------------------------------------------------------------------------------------------------------------------------------------------------------------------------------------------------------------------------------------------------------------------------------------------------|
| 2                 | gi 21593511                 | pheromone receptor            | R.SIAADSWSIKSEYGSTLDDDDQR.H<br>R.HADAAEALSSANFR.V<br>R.HADAAEALSSANFRVSSDYSSDK.E<br>K.LVMDKGTLD AIGLHPDGPVK.R<br>R.TYPTFMFGGSVGSRVATVAFLR.K + Oxidation (M)                                                                                                                                                                                                           |
| 19                | gi 118486611                | unknown                       | K.GMALQQRK.S + Oxidation (M)<br>K.KLSEEEQNTLR.A<br>R.AASLLQDLAKEKPGDPDVFR.L<br>K.NVDFEVLRGHANALLAAK.K<br>R.GYLAKGIILK.E<br>K.GILKENG NVGDAER.M                                                                                                                                                                                                                        |
| 32                | gi 116780007                | unknown                       | K.LVQIEHALMAVGSQTSLGIK.A<br>K.LVQIEHALMAVGSQTSLGIK.A + Oxidation (M)<br>K.KLPSILVDESSVQK.I<br>K.IQLLTSNIGVTYSGMGPDSR.V<br>K.IQLLTSNIGVTYSGMGPDSR.V + Oxidation (M)<br>R.KQAQQYYK.L<br>K.LYKEPIPVTQLVR.E<br>K.EPIPVTQLVR.E<br>K.RYTEDMELDDAVHTAILTLK.E<br>R.YTEDMELDDAVHTAILTLK.E<br>R.YTEDMELDDAVHTAILTLK.E + Oxidation (M)<br>K.NIEIGVVGTD.R.K<br>K.NIEIGVVGTD.R.K.F |

Table S1. Cont.

| Spot <sup>a</sup> | NCBI accession <sup>b</sup> | Protein identity <sup>c</sup> | Peptide sequence                                                                                                                                                                                                                                                                              |
|-------------------|-----------------------------|-------------------------------|-----------------------------------------------------------------------------------------------------------------------------------------------------------------------------------------------------------------------------------------------------------------------------------------------|
| 38                | gi 148906365                | unknown                       | R.AAVPSGASTGVYEALELR.D<br>K.KIPLYQHIANIAGNK.T<br>K.LAMQEFMILPVGASSFR.E<br>K.LAMQEFMILPVGASSFR.E + Oxidation (M)<br>K.LAMQEFMILPVGASSFR.E + 2 Oxidation (M)<br>R.EAMQMGSEVYHHLK.A<br>K.YGQDATNVGDEGGFAPNIQENK.E<br>K.VVIGMDVAASEFYTEK.D<br>K.YDLNFKEENNGSQK.I<br>R.AGWGVM TSHR.S<br>K.YNQLLR.I |
| 46                | gi 116789937                | unknown                       | M.APRPLDYECINENVK.K<br>R.GELYLR.A<br>K.IIFTNVGNPQALGQRPLTFPR.Q<br>K.HYLAMTTGGLGAYSDSR.G<br>K.EVAEFIER.R<br>K.GVMQILNTIIR.D<br>K.GVMQILNTIIR.D + Oxidation (M)<br>K.GVMQILNTIIRDEK.D<br>K.GVMQILNTIIRDEK.D + Oxidation (M)<br>R.AMVIINPGNPTGQCLSR.D<br>K.GYWGECEGQR.G<br>K.EGVFHLR.T           |

Table S1. Cont.

| Spot <sup>a</sup> | NCBI accession <sup>b</sup> | Protein identity <sup>c</sup>             | Peptide sequence                                                                                                                                        |
|-------------------|-----------------------------|-------------------------------------------|---------------------------------------------------------------------------------------------------------------------------------------------------------|
| 58                | gi 357488033                | hypothetical protein MTR_5g047930         | M.GVELDSQSFEFNDSDENSPTFK.S<br>K.KIEHGFDSPPNDMK.S<br>K.IEHGFDSPPNDMKSANCMPPDK.L<br>R.SSNDVGSFMMFATDK.Q<br>K.AMDLHEDMHDSVAPDDK.D<br>R.RGFGESSFSAAGAVSGR.I |
| 61                | gi 242033729                | hypothetical protein SORBIDRAFT_01g015060 | R.SFGFVTFLER.E<br>R.QQEEEMQR.L<br>R.AAMQAAEKLHR.E<br>R.EKLAER.E<br>K.EEETADPMAAAEAQAVK.Q                                                                |

<sup>a</sup> Assigned spot number as indicated in Figure 2A and Table 1; <sup>b</sup> Database accession numbers according to NCBI; <sup>c</sup> The name of the proteins identified by MALDI-TOF MS.



**Table S2.** The details of identified proteins in *Taxus wallichiana* var. *mairei* under AR stress.

| Spot <sup>a</sup> | NCBI accession <sup>b</sup> | Protein identity <sup>c</sup>                   | Peptide sequence                                                                                                                                                                                                            |
|-------------------|-----------------------------|-------------------------------------------------|-----------------------------------------------------------------------------------------------------------------------------------------------------------------------------------------------------------------------------|
| Metabolism        |                             |                                                 |                                                                                                                                                                                                                             |
| 9                 | gi 3913651                  | ferredoxin-NADP reductase                       | -.MATAVSAAVSLPSSKSTSFSSR.T + Oxidation (M)<br>K.INFNKVPLYR.N<br>K.EMLMPKDPNATVIMLATGTGIAPFR.S + 2 Oxidation (M)<br>K.HEDYKFNGTAWLFLGVPTSSSLLYK.E<br>K.MYIQTRMAQYAEELWTLQK.D + Oxidation (M)<br>K.GMEQGIDEIMSALAERDGVWADYK.K |
| 13                | gi 15228869                 | copper chaperone                                | -.MAQTVVLKVGMSQGCVGAVNR.V + 2 Oxidation (M)<br>K.VGMSQGCVGAVNRVLGK.M<br>R.VLGKMEGVESFDIDIK.E + Oxidation (M)<br>K.MEGVESFDIDIKEQK.V + Oxidation (M)                                                                         |
| 21                | gi 334184891                | aconitase/3-isopropylmalate dehydratase protein | -.MAASLQSANPTLSR.T<br>R.TLASPNKPSSFATFR.S<br>K.LGSYALVGLPASYK.E<br>K.AVVAQSYARIFR.N<br>R.VCDECTTGDVATVELR.E<br>K.AGMIPSAAA.- + Oxidation (M)                                                                                |
| Cell structure    |                             |                                                 |                                                                                                                                                                                                                             |
| 14                | gi 2500930                  | beta-fructofuranosidase                         | K.SPKNPLMEPTIANK.I + Oxidation (M)<br>K.NPLMEPTIANK.I<br>K.HPLHSAEGTGMWECPDFYVLDK.N                                                                                                                                         |

Table S2. Cont.

| Spot <sup>a</sup>                    | NCBI accession <sup>b</sup> | Protein identity <sup>c</sup>                   | Peptide sequence                                                                                                                                                                                                                       |
|--------------------------------------|-----------------------------|-------------------------------------------------|----------------------------------------------------------------------------------------------------------------------------------------------------------------------------------------------------------------------------------------|
|                                      |                             |                                                 | K.HPLHSAEGTGMWECPDFYFVLDKNLLR.T<br>K.GAGVKGGVGPFGLLVFASQGLK.E<br>R.VYPTLAIHDK.A                                                                                                                                                        |
| 23                                   | gi 357521323                | microtubule associated protein type 2           | -.MAEFSGDVGMPTVVTPVPLTVSGSFK.E<br>R.ELSEAQAEIKALK.H<br>K.DDDMPPIEAILAPLEAELK.L<br>R.MHRLK.V<br>R.ELEEAVLAGGAAANAVRDYQR.K<br>K.DANDKVMPVK.Q + Oxidation (M)<br>R.GTSEGKCVSNGPSR.R<br>K.ILLNGKPPSSSFNQSSER.T<br>K.ILLNGKPPSSSFNQSSERTK.D |
| 25                                   | gi 159490038                | eta tubulin                                     | M.LIHSLAGGSGSGLGSRLLEHLR.Q<br>R.QEFPLAHLAAASVTPR.L<br>R.ADALRGNAPISTAGALLMAR.G<br>R.GNAPISTAGALLMAR.G<br>R.GYPIAAVPPGDGGPAQAALLSAYVK.S<br>K.SLGPSGAAPTLAPEASLWLR.S                                                                     |
| Photosynthesis and energy production |                             |                                                 |                                                                                                                                                                                                                                        |
| 1                                    | gi 226498532                | NADH-ubiquinone oxidoreductase 10.5 kDa subunit | R.VLFCQSSPASAPAREFVK.K<br>K.KNYGDIK.A<br>R.YDMGVERCVNLDGLTEAQIDK.K<br>R.CVNLDGLTEAQIDKK.L                                                                                                                                              |

Table S2. Cont.

| Spot <sup>a</sup> | NCBI accession <sup>b</sup> | Protein identity <sup>c</sup> | Peptide sequence                                                                                                                                                                                                                                                                                                                                                                                                                                                                                              |
|-------------------|-----------------------------|-------------------------------|---------------------------------------------------------------------------------------------------------------------------------------------------------------------------------------------------------------------------------------------------------------------------------------------------------------------------------------------------------------------------------------------------------------------------------------------------------------------------------------------------------------|
| 3                 | gi 138277483                | ATP synthase beta subunit     | R.IAQIIGPVLDVSFPPGNMPK.I<br>R.GMIVIDTGAPLSVPVGETTLGR.I<br>R.GMIVIDTGAPLSVPVGETTLGR.I + Oxidation (M)<br>R.IFNVLGEPVDDLGPVNALTTSPIHR.S<br>K.FSIFETGIK.V<br>K.VVDLLAPYR.R<br>K.AHGGVSVFGGVGER.T<br>K.VALVYGQMNEPPGAR.M<br>K.VALVYGQMNEPPGAR.M + Oxidation (M)<br>R.VGLTALTMAEYFR.D<br>R.VGLTALTMAEYFR.D + Oxidation (M)<br>R.DV NKQDVLLFIDNIFR.F<br>K.QDVLLFIDNIFR.F<br>R.FVQAGSEVSALLGR.M<br>R.MPSAVGYQPTLSTEMGSLQER.I<br>R.YKELQDIIAILGLDELSEEDR.L<br>K.ELQDIIAILGLDELSEEDR.L<br>K.ELQDIIAILGLDELSEEDRLTVAR.A |
| 5                 | gi 138277483                | ATP synthase beta subunit     | R.IAQIIGPVLDVSFPPGNMPK.I<br>R.AVAMSATDGLMR.G<br>R.GMIVIDTGAPLSVPVGETTLGR.I<br>R.GMIVIDTGAPLSVPVGETTLGR.I + Oxidation (M)<br>R.IFNVLGEPVDDLGPVNALTTSPIHR.S                                                                                                                                                                                                                                                                                                                                                     |

Table S2. Cont.

| Spot <sup>a</sup> | NCBI accession <sup>b</sup> | Protein identity <sup>c</sup>           | Peptide sequence                          |
|-------------------|-----------------------------|-----------------------------------------|-------------------------------------------|
|                   |                             |                                         | K.FSIFETGIK.V                             |
|                   |                             |                                         | K.VVDLLAPYR.R                             |
|                   |                             |                                         | K.AHGGVSVFGGVGER.T                        |
|                   |                             |                                         | K.VALVYQMNEPPGAR.M                        |
|                   |                             |                                         | K.VALVYQMNEPPGAR.M + Oxidation (M)        |
|                   |                             |                                         | R.VGLTALTMAEYFR.D                         |
|                   |                             |                                         | R.VGLTALTMAEYFR.D + Oxidation (M)         |
|                   |                             |                                         | R.DVNKQDVLLFIDNIFR.F                      |
|                   |                             |                                         | K.QDVLLFIDNIFR.F                          |
|                   |                             |                                         | R.FVQAGSEVSALLGR.M                        |
|                   |                             |                                         | R.MPSAVGYQPTLSTEMGSLQER.I                 |
|                   |                             |                                         | R.MPSAVGYQPTLSTEMGSLQER.I + Oxidation (M) |
|                   |                             |                                         | R.YKELQDIIAILGLDELSEEDR.L                 |
|                   |                             |                                         | K.ELQDIIAILGLDELSEEDR.L                   |
|                   |                             |                                         | K.ELQDIIAILGLDELSEEDRLTVAR.A              |
| 10                | gi 357137138                | phosphoribulokinase                     | -.MAICSAHTTTSLRSPCTTISNTGLR.Q             |
|                   |                             |                                         | R.RLTSVFGGAAEPPK.G                        |
|                   |                             |                                         | K.GGNPDSNTLISDTTTVICLDDYHSLDR.T           |
|                   |                             |                                         | R.VRDLLDFSIYLDISNEVK.F                    |
|                   |                             |                                         | R.DLLDFSIYLDISNEVK.F                      |
|                   |                             |                                         | R.KPDFDAYIDPQK.Q                          |
|                   |                             |                                         | R.LDELIYVESHLSNLSTK.F                     |
| 11                | gi 225459844                | ATP-dependent zinc metalloprotease FTSH | R.RAQQGPGGPGGLGGPMDFGR.S                  |
|                   |                             |                                         | R.AQQGPGGPGGLGGPMDFGR.S                   |

Table S2. Cont.

| Spot <sup>a</sup> | NCBI accession <sup>b</sup> | Protein identity <sup>c</sup>          | Peptide sequence                                                                                                                                                                                                                                                                                                                                                                                              |
|-------------------|-----------------------------|----------------------------------------|---------------------------------------------------------------------------------------------------------------------------------------------------------------------------------------------------------------------------------------------------------------------------------------------------------------------------------------------------------------------------------------------------------------|
|                   |                             |                                        | R.AQGGPGGPGGLGGPMDFGR.S + Oxidation (M)<br>K.LELQEVVDFLK.N<br>R.AVAGEAGVPPFSCAASEFVELFVGVGASR.V<br>K.SKAPCIVFIDEIDAVGR.Q<br>K.APCIVFIDEIDAVGR.Q<br>R.TPGFTGADLQNLNMEAAILAAR.R<br>K.LVAYHEAGHALVGALMPEYDPVAK.I<br>R.GQAGGLTFFAPSEER.L<br>R.LESGLYSRSYLENQMAVALGGR.V + Oxidation (M)<br>R.SYLENQMAVALGGR.V<br>R.SYLENQMAVALGGR.V + Oxidation (M)<br>K.DYSMATADIVDAEVR.E + Oxidation (M)<br>K.ETVDGEEFMSLFIDGK.A |
| 12                | gi 7592732                  | plasma membrane H <sup>+</sup> -ATPase | -.TGTLTlnkltvdk.N<br>K.GIDANTVVLMAAR.A<br>R.TALTYIDGQGMHR.V + Oxidation (M)<br>K.GAPEQILNMAHNK.S + Oxidation (M)<br>R.VHAVIDKFAER.G<br>R.SLAVAYQEVTEKR.M                                                                                                                                                                                                                                                      |
| 15                | gi 150251443                | ATP synthase CF1 alpha chain           | R.VVNALAQPIDGR.G<br>R.RSVYEPLQTGLIAIDSMPIGR.G<br>R.SVYEPLQTGLIAIDSMPIGR.G<br>R.SVYEPLQTGLIAIDSMPIGR.G + Oxidation<br>K.GQDVICVYVAIGQK.A                                                                                                                                                                                                                                                                       |

Table S2. Cont.

| Spot <sup>a</sup>  | NCBI accession <sup>b</sup> | Protein identity <sup>c</sup>    | Peptide sequence                                                                                                                                                                                                                                                      |
|--------------------|-----------------------------|----------------------------------|-----------------------------------------------------------------------------------------------------------------------------------------------------------------------------------------------------------------------------------------------------------------------|
|                    |                             |                                  | K.EQHTLIYDDLK.Q<br>R.KFLVQLR.E<br>K.FLVQLR.E<br>K.EAIQEHIELFLLR.E                                                                                                                                                                                                     |
| 16                 | gi 154146830                | phosphoenolpyruvate carboxylase  | -.HTDVIDAITTHLGIGSYR.S<br>K.GKRPLLPPDLPMTTEEIADVIGAMK.V<br>K.LFSTDWYINHIGGK.Q<br>K.QQVMVGYSDSGKDAGR.L<br>R.LSAAWQLYVAQEEMAK.V + Oxidation (M)<br>R.FTAATLEHGMHPPVSPKPEWR.K + Oxidation (M)<br>R.FTAATLEHGMHPPVSPKPEWRK.L<br>K.LMEEMAVVATEEYRSVVVK.E + 2 Oxidation (M) |
| 20                 | gi 350536787                | chloroplast malate dehydrogenase | -.MEEAEFIPSSSLTK.T<br>K.KTECFGVFCLTYDLK.D<br>K.KLINVSVGAAGMIANHFLFK.L<br>K.KLINVSVGAAGMIANHFLFK.L + Oxidation (M)<br>R.SGLLDINVQIFAEQGK.A<br>R.GGVLIQK.W<br>K.WGRSSAASTAVSVVDAMR.S<br>K.DIVFSMPCRSK.G                                                                 |
| Stress and defense |                             |                                  |                                                                                                                                                                                                                                                                       |
| 6                  | gi 357520455                | cysteine proteinase inhibitor    | K.DMFCCRPREVK.W<br>K.DMFCCRPREVK.W + Oxidation (M)                                                                                                                                                                                                                    |

Table S2. Cont.

| Spot <sup>a</sup>   | NCBI accession <sup>b</sup> | Protein identity <sup>c</sup>                          | Peptide sequence                                                                                                                                                                                         |
|---------------------|-----------------------------|--------------------------------------------------------|----------------------------------------------------------------------------------------------------------------------------------------------------------------------------------------------------------|
|                     |                             |                                                        | R.EVKWSR.Y<br>K.FVNVVNAEFRR.C<br>R.RCGAMGYHITLK.A<br>K.YGRLHWFLSYV.-                                                                                                                                     |
| Hormone response    |                             |                                                        |                                                                                                                                                                                                          |
| 4                   | gi 76009223                 | isochorismate synthase                                 | R.LSICSEALAGTR.A<br>R.RLEAVCSSVIIIEPK.K<br>R.LEAVCSSVIIIEPKK.A<br>R.GRLQAEDDEFK.I                                                                                                                        |
| 19                  | gi 335346406                | abscisic acid 8-hydroxylase                            | -.MEFIMVMLFTLATIFFLK.K + 3 Oxidation (M)<br>-.MEFIMVMLFTLATIFFLKK.W + Oxidation (M)<br>K.YGSIFK.T<br>K.THILGCPCVMISSPEAAKVVLVTK.A + Oxidation (M)<br>K.ERMLGK.Q<br>K.LVLRAFMPDALK.N<br>K.GKEGQVLCWEHTK.K |
| Signal transduction |                             |                                                        |                                                                                                                                                                                                          |
| 2                   | gi 357132195                | light-mediated development protein DET1-like isoform 2 | K.QRLLSFIFR.K<br>R.LLSFIFR.K<br>R.LLSFIFR.K.T<br>K.TWNEEPDQTLRVQHLK.K                                                                                                                                    |

Table S2. Cont.

| Spot <sup>a</sup> | NCBI accession <sup>b</sup> | Protein identity <sup>c</sup>                          | Peptide sequence                                                                                                                                                                                        |
|-------------------|-----------------------------|--------------------------------------------------------|---------------------------------------------------------------------------------------------------------------------------------------------------------------------------------------------------------|
|                   |                             |                                                        | K.MMASLPYTCQSQSPSPYFDLTLFR.Y<br>R.QPNVVK.F<br>K.IKPGSDSGASDSRAK.R                                                                                                                                       |
| 8                 | gi 384245525                | calcium-binding protein CML19 (centrin)                | K.VAMRALGFEPK.K + Oxidation (M)<br>K.DGSGTIDFDEFLTMMTAK.M + 2 Oxidation (M)<br>K.DGSGTIDFDEFLTMMTAKMDER.D + 3 Oxidation (M)<br>K.ELGENMTDEELQEMIDEADR.D                                                 |
| 17                | gi 356573251                | calcium-binding protein KIC-like                       | K.EITVEVEEFEDLLPVMMAKK.L<br>R.NSTLLGMDGMSKEEAETMVR.Q + Oxidation (M)<br>R.NSTLLGMDGMSKEEAETMVR.Q + 2 Oxidation (M)<br>K.EEAETMVRQGDLDGDGK.L + Oxidation (M)<br>R.QGDLDGDGKLNTEFCILMVR.L + Oxidation (M) |
| Transcription     |                             |                                                        |                                                                                                                                                                                                         |
| 7                 | gi 154082680                | maturase K                                             | R.MPLESGFYDNK.S + Oxidation (M)<br>R.TYFYRK.V<br>K.DPNVHYVRYQGK.L<br>R.NLSHYYSGSSK.K<br>R.LSCVKSLAR.K<br>R.VSSTSRSFYLVR.G                                                                               |
| 24                | gi 79481163                 | RNA polymerase II C-terminal domain phosphatase-like 1 | R.DNKTAVMLLGGEELHLVAMYSENIK.N + 2 Oxidation (M)<br>R.CLGIVFDLDETLVVANTMR.S<br>R.LAVIVAEMKR.Y                                                                                                            |



Table S2. Cont.

| Spot <sup>a</sup>                          | NCBI accession <sup>b</sup> | Protein identity <sup>c</sup>  | Peptide sequence                                                                                                                                                                           |
|--------------------------------------------|-----------------------------|--------------------------------|--------------------------------------------------------------------------------------------------------------------------------------------------------------------------------------------|
|                                            |                             |                                | K.NIILTRINPMIR.D + Oxidation (M)<br>K.DPLSFDGMADTEVERR.L<br>R.MLHENRRPPK.E<br>R.SVSATETSADVLHGIAIK.C<br>R.SVSATETSADVLHGIAIKCGAK.V<br>R.FSVEAWLSNQK.I<br>R.DETALPVSSRPTDPRLEGSMR.H         |
| 26                                         | gi 15341050                 | maturase K                     | K.DISCLHLLR.F<br>K.DISCLHLLRFFLYEYCNSVIIK.R<br>R.VYFYLK.L<br>R.GTFLLMTKLLK.Y<br>K.KFETLVPIMPIMIGSLAK.A + Oxidation (M)<br>K.FCNVLGHPISKPAWADLSDSDIIR.R<br>R.FGRMCR.N + Oxidation (M)       |
| Function unknown and hypothetical proteins |                             |                                |                                                                                                                                                                                            |
| 18                                         | gi 125547814                | hypothetical protein OsI_15422 | R.TLFRTSGDVVAR.M<br>R.TSGDVVAR.M<br>R.DRLVESYTWSQMLFYEEGLALTR.I<br>R.LVESYTWSQMLFYEEGLALTR.I + Oxidation (M)<br>K.TSTVQLLCVSTTVGR.G<br>K.LDSLIEDEWRTMNHAR.Y<br>K.DAYTFSTHLQEIVRSLFVNPIPI.- |

Table S2. Cont.

| Spot <sup>a</sup> | NCBI accession <sup>b</sup> | Protein identity <sup>c</sup> | Peptide sequence                                                                                                                                                                                                                                                                                                          |
|-------------------|-----------------------------|-------------------------------|---------------------------------------------------------------------------------------------------------------------------------------------------------------------------------------------------------------------------------------------------------------------------------------------------------------------------|
| 22                | gi 296087931                | unnamed protein product       | -.MTHSQK.D + Oxidation (M)<br>K.DVAYHAEDLLDEIATEALR.C<br>K.AWNWEKVSTWVK.V<br>K.IVVTSRSETAAK.I<br>R.SETAAKIMR.A + Oxidation (M)<br>K.DYEFDKK.L<br>K.LQKISDK.A<br>K.AVVFETFESVK.R<br>R.LPESICCLCNLQTMMLSKCR.C + 2 Oxidation (M)<br>R.YLDISGSNSLKEMPNDIDQLK.S + Oxidation (M)<br>K.LEISKMENVVGVEDALQAHMK.D + 2 Oxidation (M) |

<sup>a</sup> Assigned spot number as indicated in Figure 2C and Table 2; <sup>b</sup> Database accession numbers according to NCBI; <sup>c</sup> The name of the proteins identified by MALDI-TOF MS.
